# Supplementary material
Source: PubMed Central journal article supplement (PMC3905326)

### **Legends for Supplemental Figures**

**Figure 1S. CM3 downregulates Hsp27 in HREC.** HREC cultures were incubated with 20 ng/mL TNF- $\alpha$ , 20 ng/mL IL-1 $\beta$  and 50 units/mL IFN- $\gamma$  for 48 h. Hsp27 was measured by Western blotting and densitometry. Representative Western blot is shown.  $\beta$ -actin was used as the loading control. The bars represent means  $\pm$  SD of three independent experiments. \*\*\*  $p < 0.0005$ , versus control. Cont =Control.

**Figure 2S. CM does not downregulate  $\alpha$ B-crystallin in HREC.** Cells were treated with CM  $\pm$  HG as described in Figure 2.  $\alpha$ B-Crystallin was measured by Western blotting and densitometry. Bars represent mean values from two independent experiments.

Fig. 1S

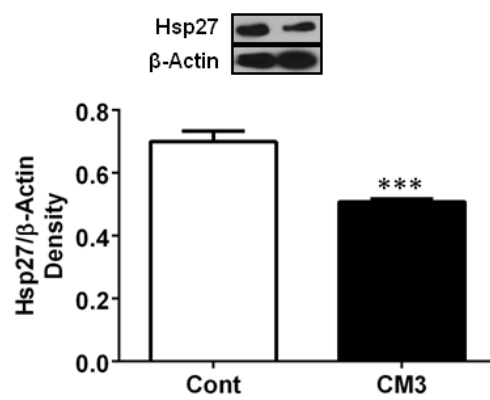

**Fig. 2S**

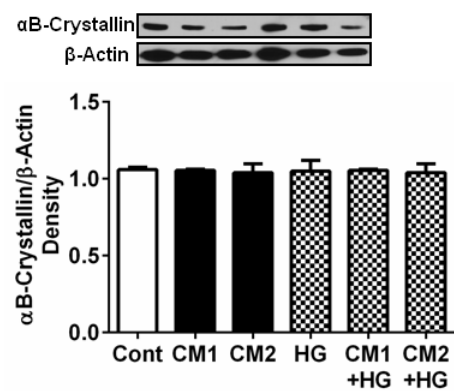

Supplement: NIHMS542538-supplement-01.pdf [file NIHMS542538-supplement-01.pdf]
